# Supplementary figures and images for: Epigenetic and Physiological Responses to Varying Root-Zone Temperatures in Greenhouse Rocket
Source: MDPI journal article supplement (doi:10.3390/genes13020364), 2022-02-17

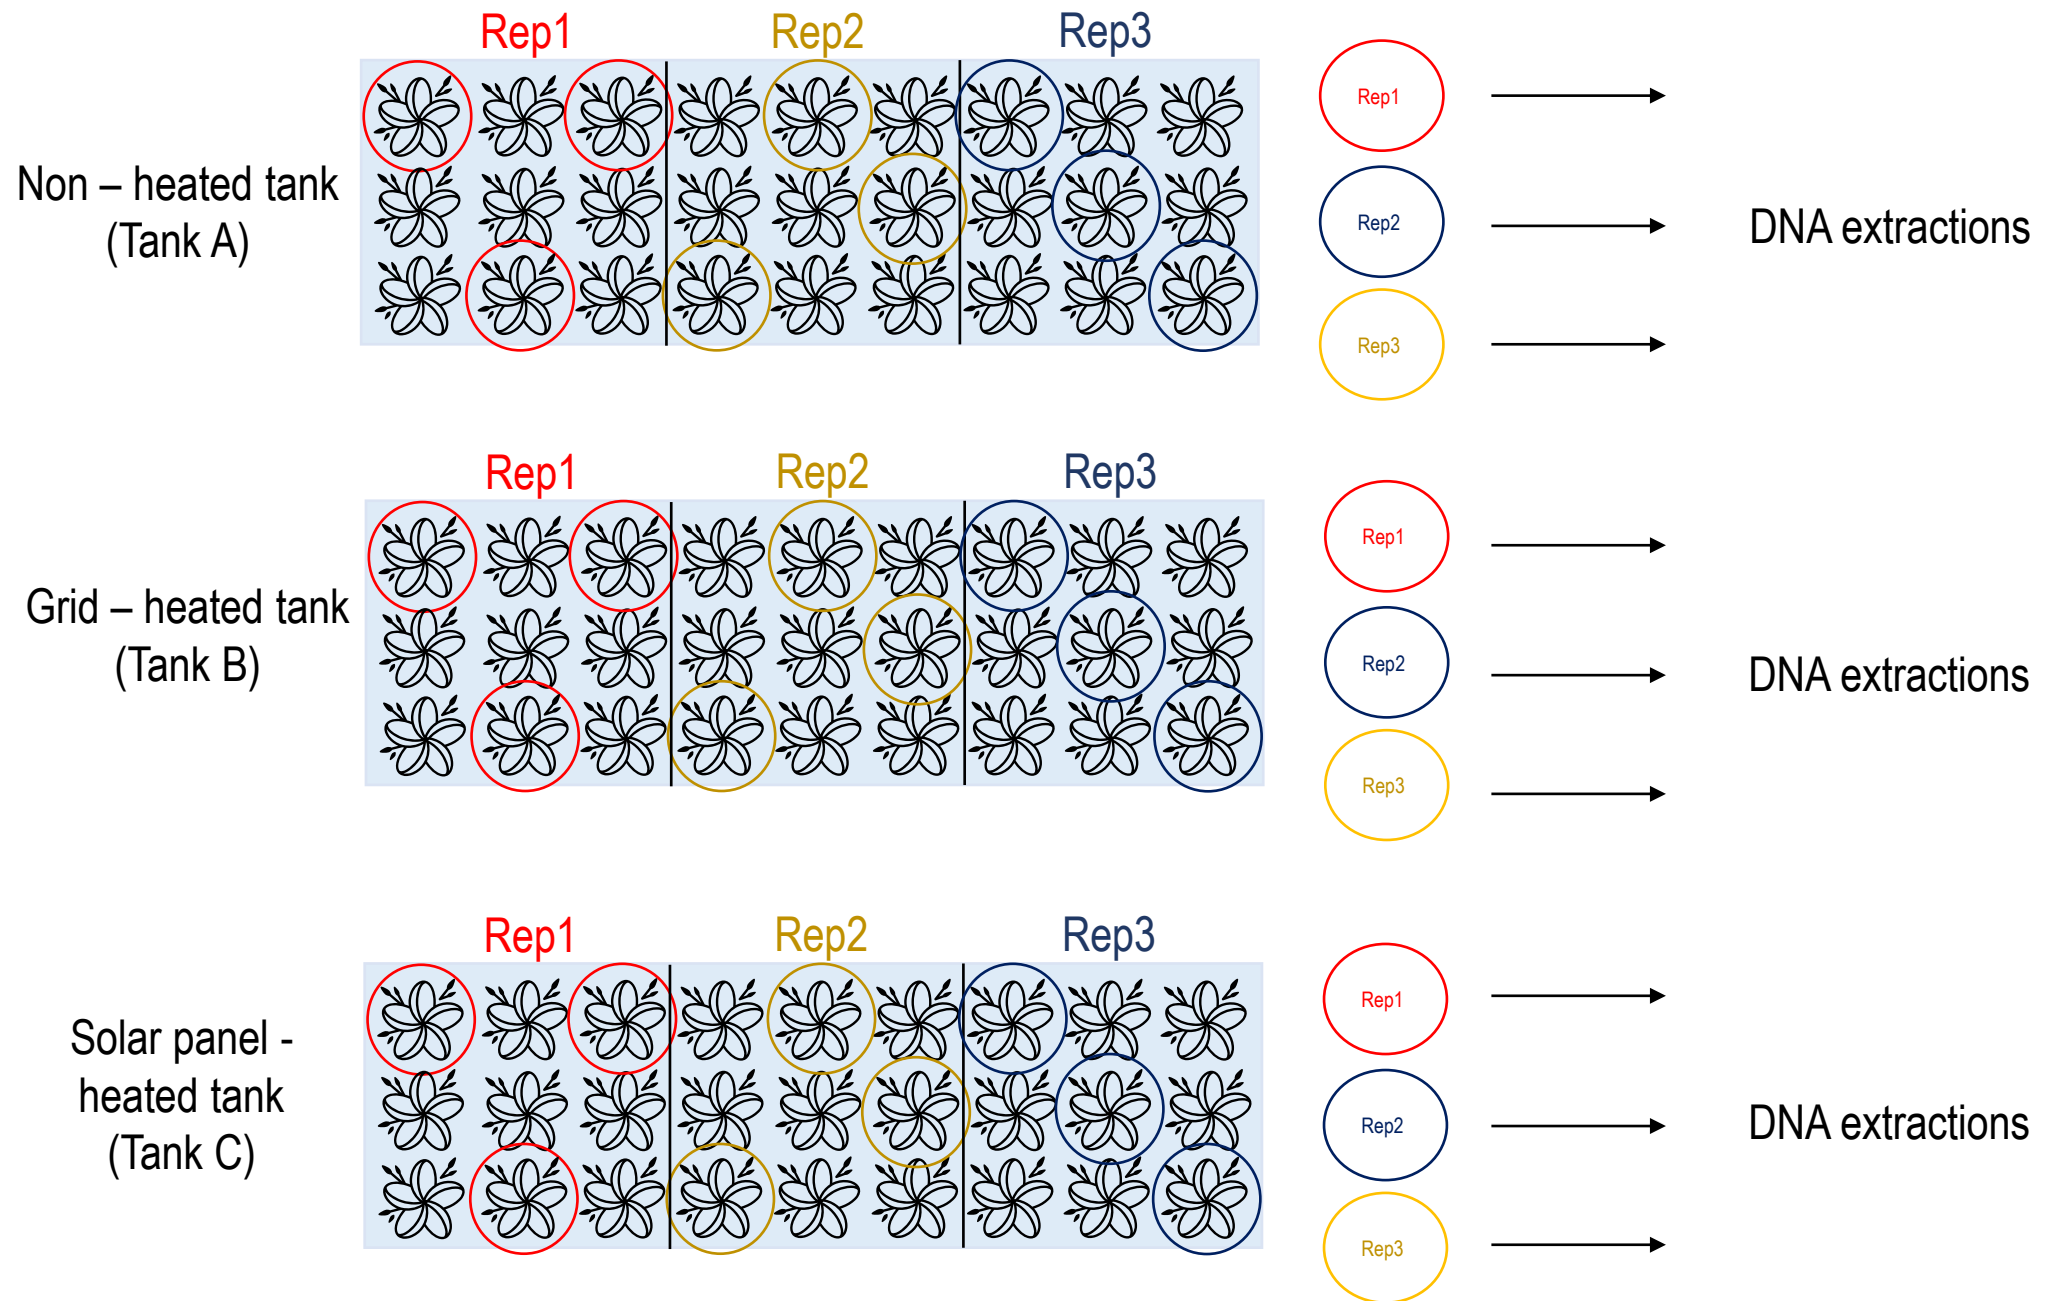

**Figure S1.** Optical representation of sampling.

Supplement: s1 [file s1]
